# Supplementary material
Source: publisher figshare collection journal article supplement (https://acs.figshare.com/ndownloader/files/23022170)
Supplement: Supplementary file 1 [file 23022170]

## *Supporting Information*

# **Acetylene/Ethylene Separation and Solid-State Structural Transformation *via* [2+2] Cycloaddition Reactions in 3D Microporous Zn<sup>II</sup> Metal–Organic Frameworks**

Arpan Hazra, Aashima Jain, M. S. Deenadayalan, Stephen Adie Adalikwu and Tapas Kumar Maji\*

Molecular Materials Laboratory, Chemistry and Physics of Materials Unit, School of Advanced Materials (SAMat), Jawaharlal Nehru Centre for Advanced Scientific Research, Jakkur, Bangalore, 560 064, India.

\*To whom correspondence should be addressed. T. K. Maji: E-mail: [tmaji@jncasr.ac.in](mailto:tmaji@jncasr.ac.in); Tel: (+91)-80-2208-2826; Fax: (+91)-80-2208-2766.

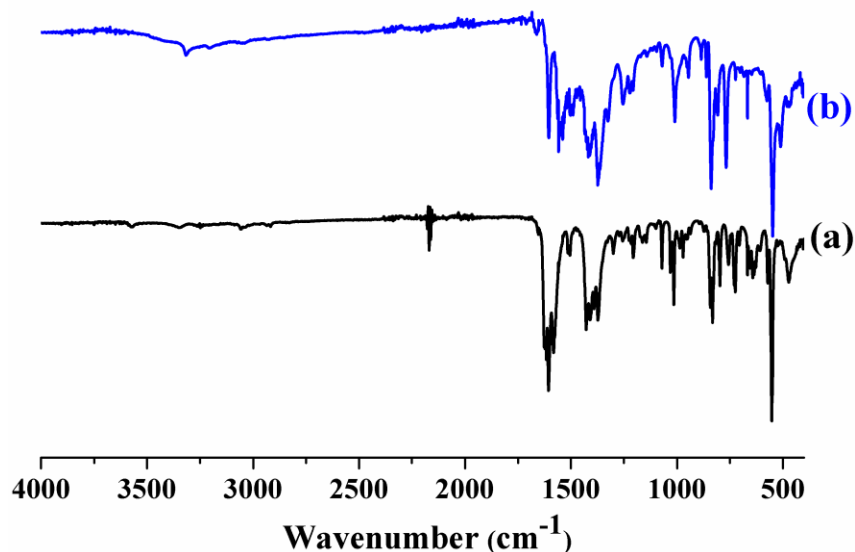

**Figure S1:** IR spectra of compounds **1** (a) and **1IR** (b).

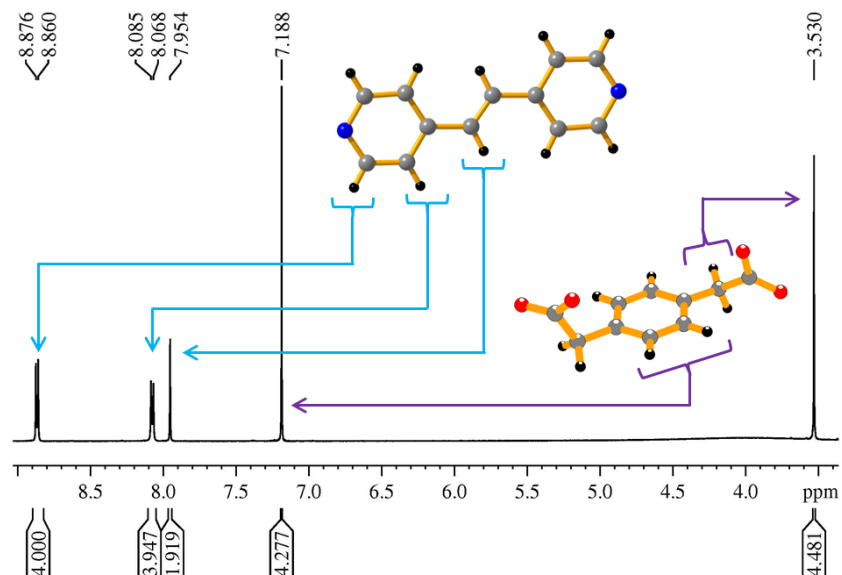

**Figure S2:** <sup>1</sup>H NMR spectra of **1** digested in DMSO-*d*<sub>6</sub>/DCI at 293 K. Two doublet signals at  $\delta = (8.876, 8.860)$  and  $(8.085, 8.068)$  ppm are due to the hydrogen atoms of pyridine ring and a singlet at  $\delta = 7.954$  is due to the hydrogen atoms of ethylinic hydrogen atoms.. The presence of *pda* molecules is reflected from the signals at  $\delta = 7.188$  and 3.530.

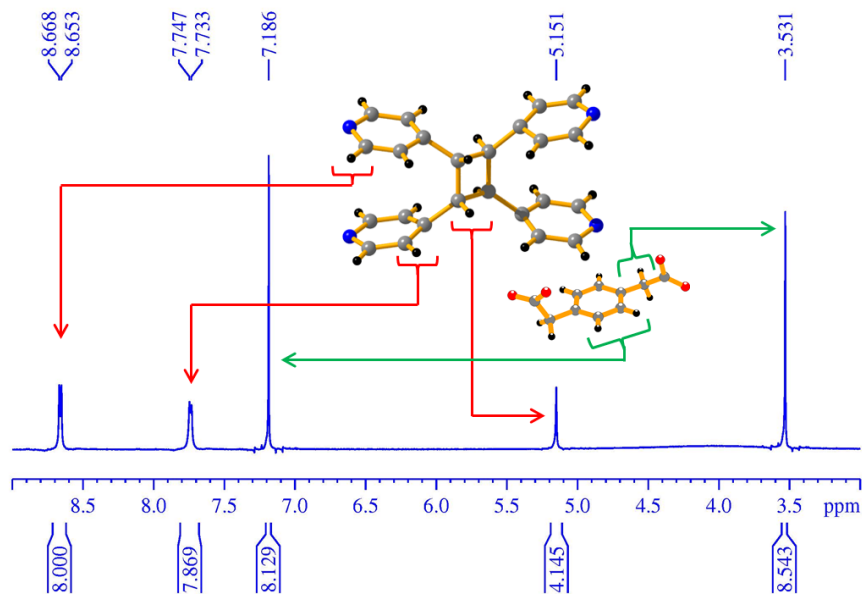

**Figure S3:** <sup>1</sup>H NMR spectra of **1IR** digested in DMSO-*d*<sub>6</sub>/DCI at 293 K. Two doublet signals at  $\delta = (8.668, 8.653)$  and  $(7.747, 7.733)$  ppm are due to the hydrogen atoms of pyridine ring and a singlet at  $\delta = 5.151$  is due to the hydrogen atoms of cyclobutane ring. The presence of *pda* molecules is reflected from the signals at  $\delta = 7.186$  and 3.531.

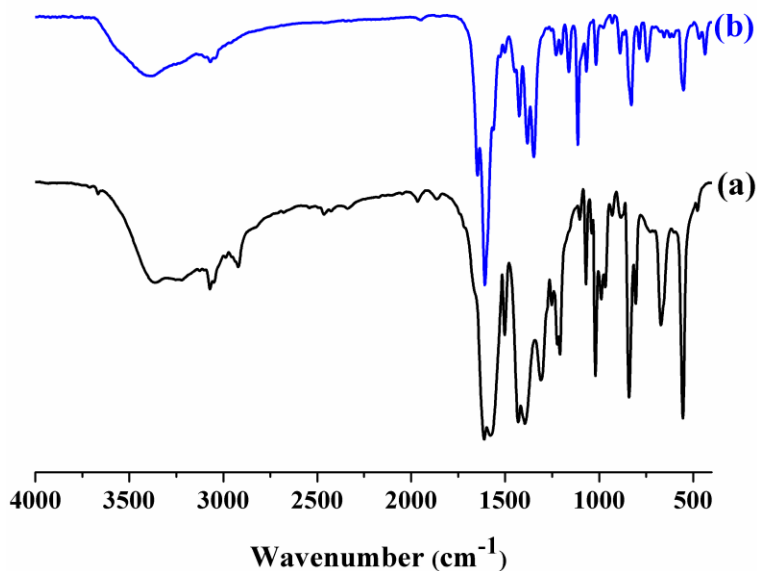

**Figure S4:** IR spectra of compounds **2** (a) and **2IR** (b).

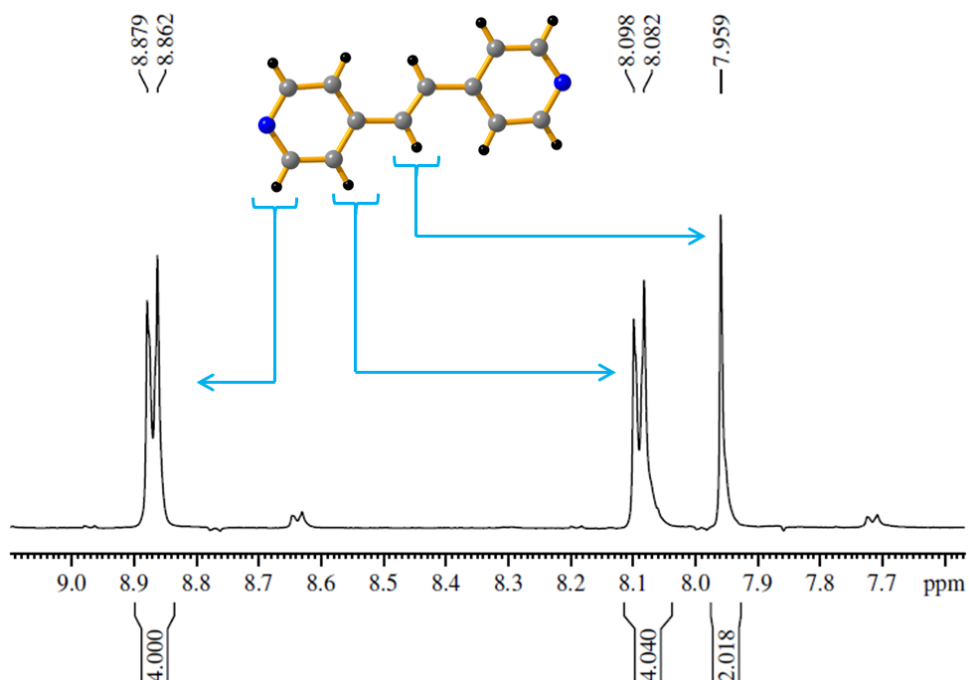

**Figure S5:**  $^1\text{H}$  NMR spectra of **2** digested in  $\text{DMSO-}d_6/\text{DCI}$  at 293 K. Two doublet signals at  $\delta = (8.879, 8.862)$  and  $(8.098, 8.082)$  ppm are due to the hydrogen atoms of pyridine ring and a singlet at  $\delta = 7.959$  is due to the hydrogen atoms of ethylenic hydrogen atoms.

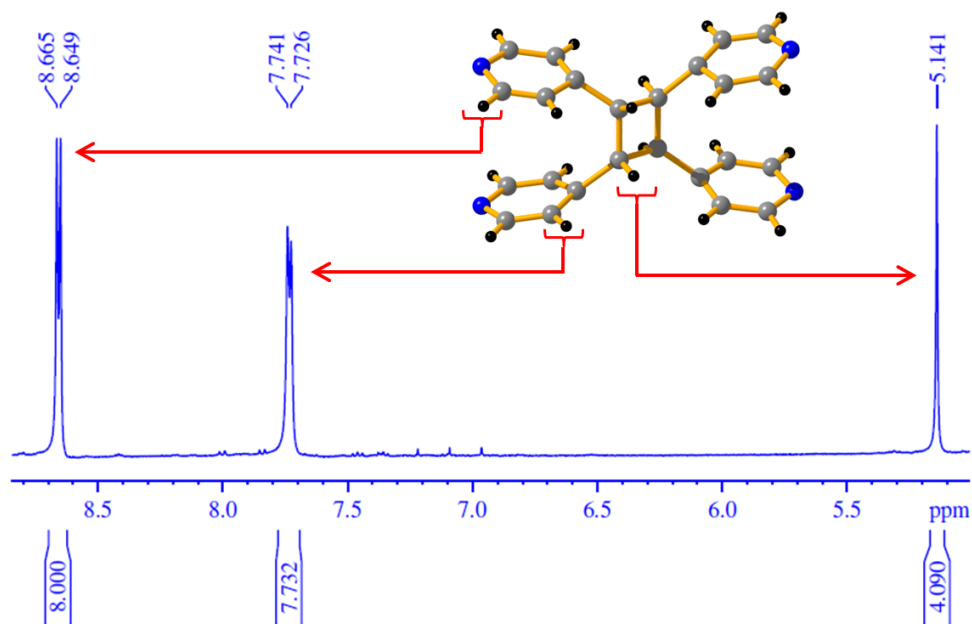

**Figure S6:**  $^1\text{H}$  NMR spectra of **2IR** digested in  $\text{DMSO-}d_6/\text{DCI}$  at 293 K. Two doublet signals at  $\delta = (8.665, 8.649)$  and  $(7.741, 7.726)$  ppm are due to the hydrogen atoms of pyridine ring and a singlet at  $\delta = 5.141$  is due to the hydrogen atoms of cyclobutane ring.

**Table S1.** Crystal data and structure refinement for the compounds.

| Identification code                           | <b>1</b>                                                                                                                            | <b>1IR</b>                                                                                                                    | <b>2</b>                                                                                                                                       | <b>2IR</b>                                                                                                                                      | <b>2<sub>LT</sub></b>                                                                                                                             | <b>2IR<sub>LT</sub></b>                                                                                                                         |
|-----------------------------------------------|-------------------------------------------------------------------------------------------------------------------------------------|-------------------------------------------------------------------------------------------------------------------------------|------------------------------------------------------------------------------------------------------------------------------------------------|-------------------------------------------------------------------------------------------------------------------------------------------------|---------------------------------------------------------------------------------------------------------------------------------------------------|-------------------------------------------------------------------------------------------------------------------------------------------------|
| Empirical formula                             | C <sub>22</sub> H <sub>18</sub> N <sub>2</sub> O <sub>4</sub> Zn                                                                    | C <sub>22</sub> H <sub>18</sub> N <sub>2</sub> O <sub>4</sub> Zn                                                              | C <sub>19</sub> H <sub>25</sub> N <sub>2</sub> O <sub>10</sub> Zn <sub>2</sub>                                                                 | C <sub>19</sub> H <sub>25</sub> N <sub>2</sub> O <sub>10</sub> Zn <sub>2</sub>                                                                  | C <sub>37</sub> H <sub>38</sub> N <sub>4</sub> O <sub>21</sub> Zn <sub>4</sub>                                                                    | C <sub>37</sub> H <sub>38</sub> N <sub>4</sub> O <sub>21</sub> Zn <sub>4</sub>                                                                  |
| Formula weight                                | 439.75                                                                                                                              | 439.75                                                                                                                        | 572.15                                                                                                                                         | 572.15                                                                                                                                          | 1136.15                                                                                                                                           | 1136.19                                                                                                                                         |
| Temperature (K)                               | 200(2)                                                                                                                              | 150(2)                                                                                                                        | 294(2)                                                                                                                                         | 293(2)                                                                                                                                          | 140(2)                                                                                                                                            | 140(2)                                                                                                                                          |
| Wavelength (Å)                                | 0.71073                                                                                                                             | 0.71073                                                                                                                       | 0.71073                                                                                                                                        | 0.71073                                                                                                                                         | 0.71073                                                                                                                                           | 0.71073                                                                                                                                         |
| Crystal system                                | monoclinic                                                                                                                          | monoclinic                                                                                                                    | triclinic                                                                                                                                      | triclinic                                                                                                                                       | triclinic                                                                                                                                         | triclinic                                                                                                                                       |
| Space group                                   | <i>P</i> 2 <sub>1</sub> / <i>n</i>                                                                                                  | <i>P</i> 2 <sub>1</sub> / <i>n</i>                                                                                            | <i>P</i> $\bar{1}$                                                                                                                             | <i>P</i> $\bar{1}$                                                                                                                              | <i>P</i> $\bar{1}$                                                                                                                                | <i>P</i> $\bar{1}$                                                                                                                              |
| Unit cell dimensions<br>(Å, °)                | <i>a</i> = 10.4566(2)<br><i>b</i> = 13.3085(2)<br><i>c</i> = 13.7189(2)<br>$\alpha$ = 90<br>$\beta$ = 101.4910(10)<br>$\gamma$ = 90 | <i>a</i> = 10.714(7)<br><i>b</i> = 13.167(4)<br><i>c</i> = 13.481(5)<br>$\alpha$ = 90<br>$\beta$ = 98.130(5)<br>$\gamma$ = 90 | <i>a</i> = 8.5951(3)<br><i>b</i> = 9.9256(5)<br><i>c</i> = 14.2522(6)<br>$\alpha$ = 104.312(2)<br>$\beta$ = 100.541(2)<br>$\gamma$ = 91.195(2) | <i>a</i> = 8.3953(5)<br><i>b</i> = 9.7690(7)<br><i>c</i> = 14.2096(11)<br>$\alpha$ = 102.584(4)<br>$\beta$ = 101.421(4)<br>$\gamma$ = 92.328(4) | <i>a</i> = 9.9307(9)<br><i>b</i> = 14.3259(12)<br><i>c</i> = 16.9889(13)<br>$\alpha$ = 100.845(3)<br>$\beta$ = 90.144(3)<br>$\gamma$ = 104.556(3) | <i>a</i> = 9.9197(5)<br><i>b</i> = 14.4346(7)<br><i>c</i> = 16.7116(8)<br>$\alpha$ = 102.412(2)<br>$\beta$ = 91.240(2)<br>$\gamma$ = 103.880(2) |
| Volume (Å <sup>3</sup> )                      | 1870.88(5)                                                                                                                          | 1882.7(15)                                                                                                                    | 1155.47(9)                                                                                                                                     | 1110.58(14)                                                                                                                                     | 2294.4(3)                                                                                                                                         | 2261.94(19)                                                                                                                                     |
| <i>Z</i>                                      | 4                                                                                                                                   | 4                                                                                                                             | 2                                                                                                                                              | 2                                                                                                                                               | 2                                                                                                                                                 | 2                                                                                                                                               |
| Calculated density<br>(g cm <sup>-3</sup> )   | 1.561                                                                                                                               | 1.551                                                                                                                         | 1.644                                                                                                                                          | 1.711                                                                                                                                           | 1.645                                                                                                                                             | 1.668                                                                                                                                           |
| Absorption<br>coefficient (mm <sup>-1</sup> ) | 1.346                                                                                                                               | 1.337                                                                                                                         | 2.132                                                                                                                                          | 2.218                                                                                                                                           | 2.149                                                                                                                                             | 2.180                                                                                                                                           |
| <i>F</i> <sub>000</sub>                       | 904                                                                                                                                 | 904                                                                                                                           | 586                                                                                                                                            | 586                                                                                                                                             | 1152                                                                                                                                              | 1152                                                                                                                                            |
| Crystal size (mm <sup>3</sup> )               | 0.140 × 0.100 ×<br>0.080                                                                                                            | 0.140 × 0.100 ×<br>0.080                                                                                                      | 0.130 × 0.100 × 0.080                                                                                                                          | 0.150 × 0.100 × 0.080                                                                                                                           | 0.140 × 0.100 × 0.080                                                                                                                             | 0.140 × 0.100 × 0.080                                                                                                                           |
| $\theta$ range for data<br>collection (°)     | 3.061 to 26.328                                                                                                                     | 3.423 to 24.997                                                                                                               | 2.416 to 27.154                                                                                                                                | 2.617 to 25.016                                                                                                                                 | 2.393 to 26.436                                                                                                                                   | 2.378 to 26.450                                                                                                                                 |
| Miller index ranges                           | -12 ≤ <i>h</i> ≤ 13, -16 ≤ <i>k</i><br>≤ 16, -17 ≤ <i>l</i> ≤ 16                                                                    | -12 ≤ <i>h</i> ≤ 12, -15 ≤ <i>k</i><br>≤ 15, -16 ≤ <i>l</i> ≤ 16                                                              | -11 ≤ <i>h</i> ≤ 11, -12 ≤ <i>k</i> ≤<br>12, -18 ≤ <i>l</i> ≤ 18                                                                               | -9 ≤ <i>h</i> ≤ 9, -11 ≤ <i>k</i> ≤ 11,<br>-16 ≤ <i>l</i> ≤ 16                                                                                  | -12 ≤ <i>h</i> ≤ 12, -17 ≤ <i>k</i> ≤<br>17, -21 ≤ <i>l</i> ≤ 21                                                                                  | -12 ≤ <i>h</i> ≤ 12, -18 ≤ <i>k</i> ≤<br>18, -20 ≤ <i>l</i> ≤ 20                                                                                |
| Reflections                                   | 27238                                                                                                                               | 28597                                                                                                                         | 22972                                                                                                                                          | 14149                                                                                                                                           | 53943                                                                                                                                             | 54400                                                                                                                                           |

|                                                             |                                    |                                    |                                    |                                    |                                    |                                    |
|-------------------------------------------------------------|------------------------------------|------------------------------------|------------------------------------|------------------------------------|------------------------------------|------------------------------------|
| collected                                                   |                                    |                                    |                                    |                                    |                                    |                                    |
| Independent reflections                                     | 3784 [ $R_{\text{int}} = 0.0599$ ] | 3299 [ $R_{\text{int}} = 0.0709$ ] | 5099 [ $R_{\text{int}} = 0.0512$ ] | 3860 [ $R_{\text{int}} = 0.0644$ ] | 9363 [ $R_{\text{int}} = 0.0480$ ] | 9300 [ $R_{\text{int}} = 0.0555$ ] |
| Completeness to $\theta_{\text{max}}$ (%)                   | 0.994                              | 0.995                              | 0.997                              | 0.988                              | 0.993                              | 0.997                              |
| Max. and min. transmission and Refinement method            | Full-matrix least-squares on $F^2$ |
| Data / restraints / parameters                              | 3784 / 12 / 281                    | 3299 / 0 / 262                     | 5099 / 36 / 318                    | 3860 / 15 / 299                    | 9368 / 152 / 678                   | 9300 / 150 / 708                   |
| Goodness-of-fit on $F^2$                                    | 1.055                              | 1.041                              | 1.035                              | 1.035                              | 1.025                              | 1.035                              |
| Final $R$ indices [ $I > 2\sigma(I)$ ]                      | $R1 = 0.0363$ , $wR2 = 0.0807$     | $R1 = 0.0323$ , $wR2 = 0.0785$     | $R1 = 0.0405$ , $wR2 = 0.0856$     | $R1 = 0.0535$ , $wR2 = 0.1187$     | $R1 = 0.0341$ , $wR2 = 0.0718$     | $R1 = 0.0386$ , $wR2 = 0.0877$     |
| $R$ indices (all data)                                      | $R1 = 0.0492$ , $wR2 = 0.0862$     | $R1 = 0.0457$ , $wR2 = 0.0871$     | $R1 = 0.0606$ , $wR2 = 0.0927$     | $R1 = 0.0770$ , $wR2 = 0.1290$     | $R1 = 0.0470$ , $wR2 = 0.0812$     | $R1 = 0.0576$ , $wR2 = 0.0958$     |
| Largest diff. peak and hole ( $\text{e } \text{\AA}^{-3}$ ) | 0.642 and -0.286                   | 0.493 and -0.438                   | 0.730 and -0.636                   | 1.784 and -1.067                   | 0.959 and -0.890                   | 1.056 and -0.826                   |

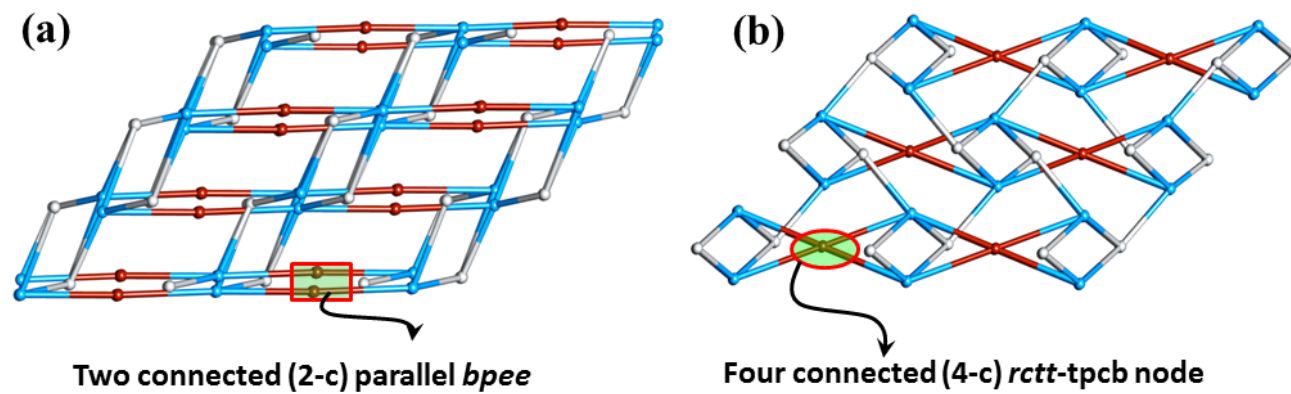

**Figure S7:** Network topology of **1** (a) and **1IR** (b) analyzed with TOPOS.<sup>1</sup>

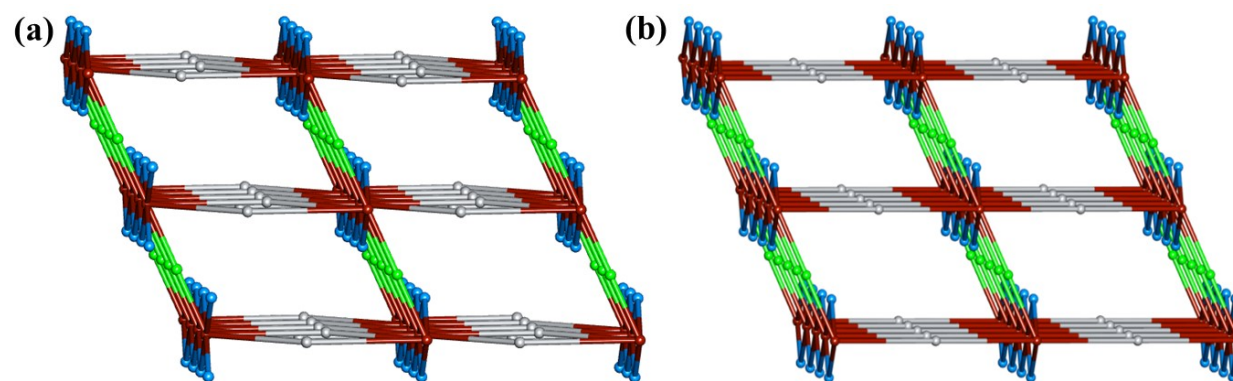

**Figure S8:** Network topology of **2** (a) and **2IR** (b) analyzed with TOPOS.<sup>1</sup>

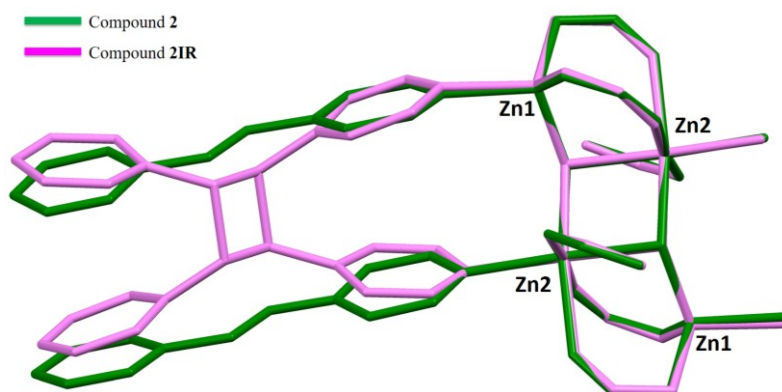

**Figure S9:** Structural overlay between compound **2** and **2IR** along the tetranuclear SBU to show the movement of ethylenic carbon atoms and pyridine rings after photo-reaction.

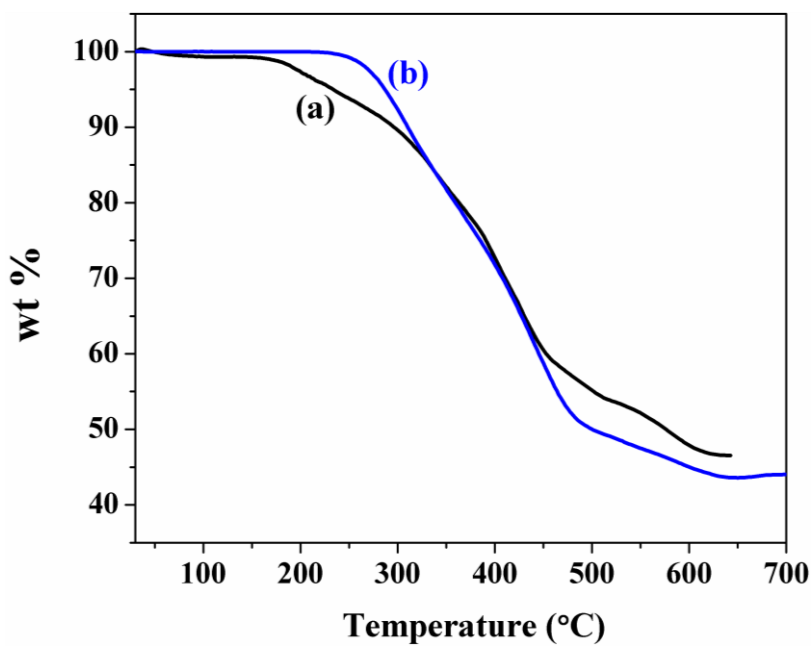

**Figure S10:** Thermogravimetric Analysis (TGA) of compound **1** (a) and **1IR** (b) in the temperature range of 25 to 700 °C (heating rate = 2 °C min<sup>-1</sup>) under N<sub>2</sub> atmosphere.



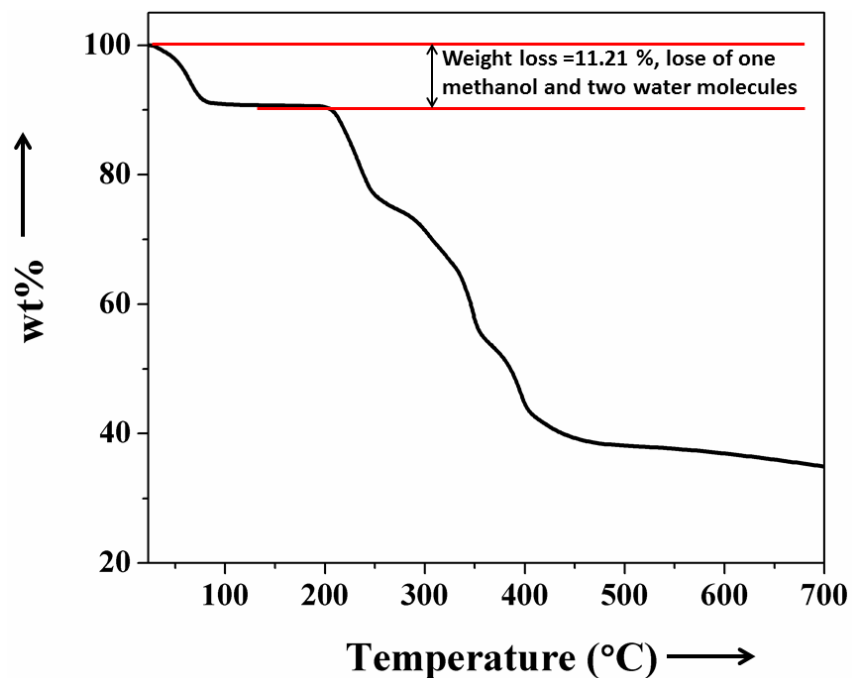

**Figure S11:** Thermogravimetric Analysis (TGA) of compound **2** in the temperature range of 25 to 700 °C (heating rate = 2°C min<sup>-1</sup>) under N<sub>2</sub> atmosphere.

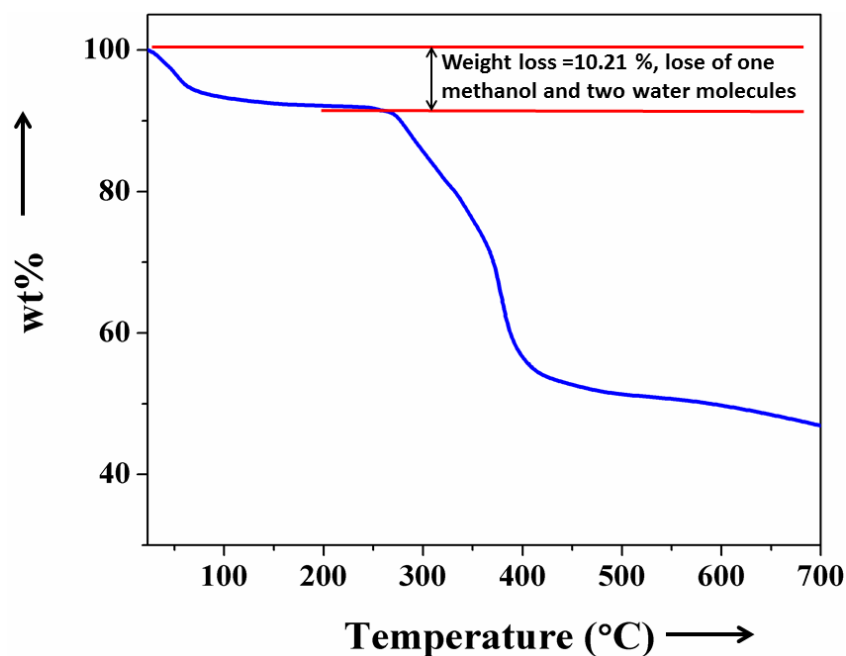

**Figure S12:** Thermogravimetric Analysis (TGA) of compound **2IR** in the temperature range of 25 to 700 °C (heating rate = 2°C min<sup>-1</sup>) under N<sub>2</sub> atmosphere.

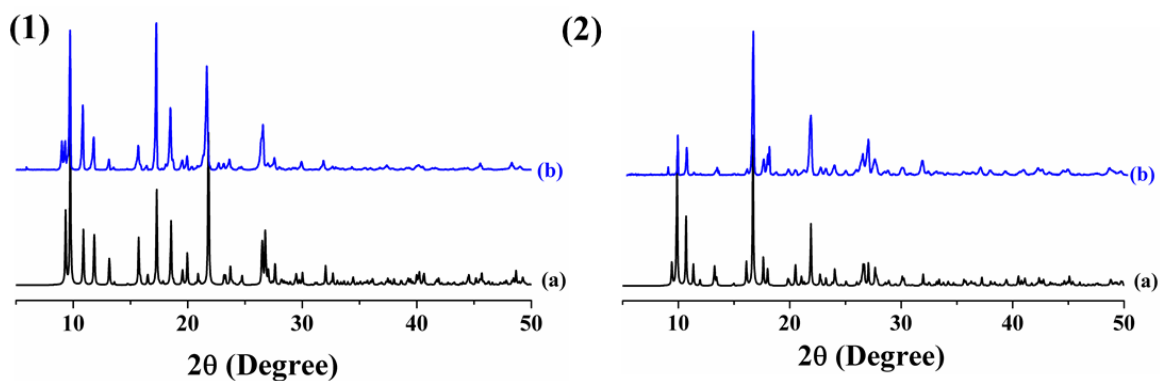

**Figure S13.** PXRD patterns of compounds **1** (1) and **1IR** (2) at different states; (a) Simulated (b) As-synthesized.

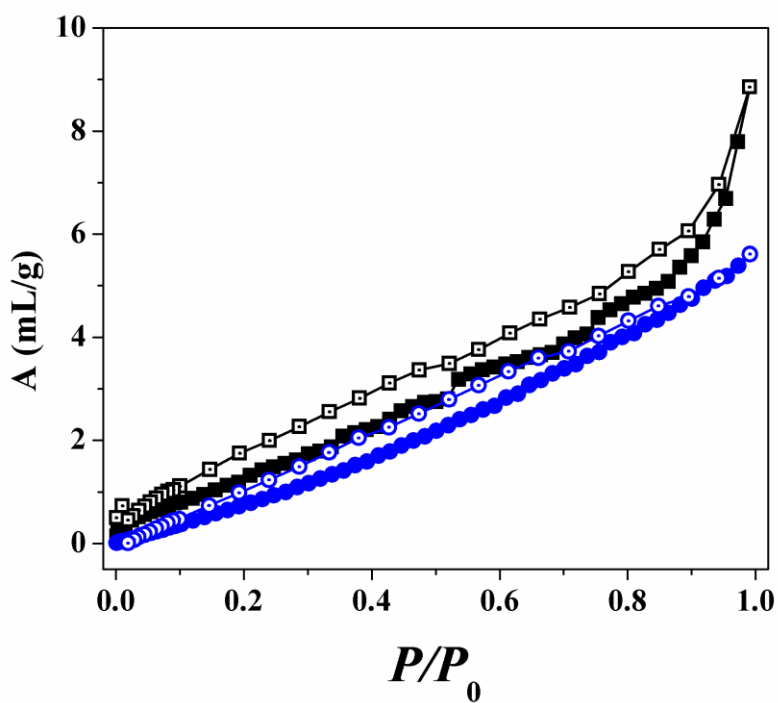

**Figure S14:** N<sub>2</sub> adsorption isotherms of compounds **2a** (black curve) and **2IRa** (blue curve) measured at 77 K. Open and closed symbols are representing adsorption and desorption respectively.  $P_0 = 680$  torr.

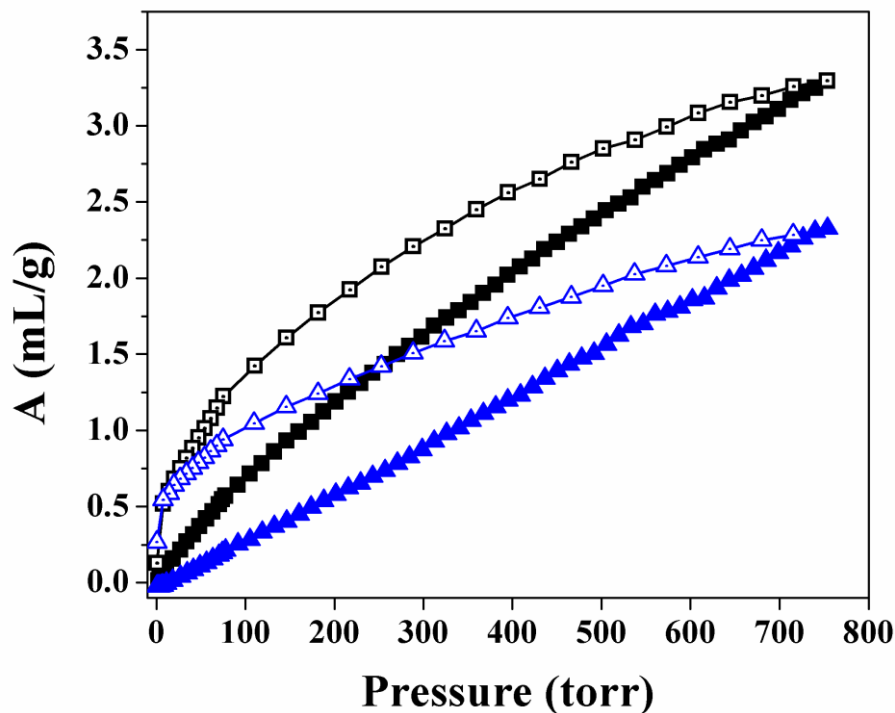

**Figure S15:** CO<sub>2</sub> adsorption isotherms of compounds **2a** (black curve) and **2IRa** (blue curve) measured at 273 K. Open and closed symbols are representing adsorption and desorption respectively.  $P_0 = 760$  torr

### S3.3.1. Analysis of Gas Adsorption Isotherms:

**Heat of Adsorption (kJ mol<sup>-1</sup>):** We have used a virial type expression<sup>2</sup> of the following type to fit the combined isotherm data collected 283 and 293 K for C<sub>2</sub>H<sub>2</sub>.

$$\ln(P) = \ln(A) + \frac{1}{T} \sum_{i=0}^m a_i A^i + \sum_{i=0}^n b_i A^i \dots\dots\dots(2)$$

Here,  $P$  is the pressure expressed in torr,  $A$  is the amount adsorbed in mmol/g,  $T$  is the temperature in K,  $a_i$  and  $b_i$  are virial coefficients, and  $m, n$  represent the number of coefficients required to adequately describe the isotherms. The values of  $m$  and  $n$  were gradually increased until the contribution of  $a$  and  $b$  coefficients added further were negligible towards the overall final fit. The values of the virial coefficient  $a_i$  were taken to calculate the isosteric heat of adsorption using the following expression.

$$Q_{st} = -R \sum_{i=0}^m a_i A^i \dots\dots\dots(3)$$

$Q_{st}$  is the coverage dependent isotheric heat of adsorption and  $R$  is the universal gas constant.

**IAST Selectivity:** The ideal adsorbed solution theory (IAST)<sup>3-5</sup> was used to predict the selectivity of  $C_2H_2$  over  $CH_4$ ,  $C_2H_4$  and  $C_2H_6$  gases. We employed the experimental pure-gas isotherms to calculate the selectivity. Previous reports have depicted that this method can predict the adsorption selectivity for mixture of isotherms in nanoporous materials, including metal-organic frameworks.<sup>6-7</sup> The single-component isotherms were fit to a single-site Langmuir-Freundlich equation.<sup>4</sup> The IAST assumes that the adsorbed phase is a two-dimensional solution in equilibrium with the bulk phase.<sup>4</sup> For binary adsorption of A and B, the IAST requires these two equations to be followed:

$$yP_t = xP_a \dots \dots \dots (4)$$

$$(1 - y)P_t = (1 - x)P_b \dots \dots \dots (5)$$

Where  $x$  and  $y$  denote the molar fraction of A in the adsorbed phase and the molar fraction of A in the bulk phase, respectively.  $P_t$  is the total gas pressure;  $P_a$  and  $P_b$  are the pressure of component A and B at the same spreading pressure as that of the mixture, respectively. The equation used for the fitting the single component gas mixture is as follows.

$$Y = Y_0 \left( \ln \frac{BP^n}{(1+BP^n)} \right) \dots \dots \dots (6)$$

Furthermore, the molar fraction of A in the adsorbed phase can be obtained from the following equation:

$$Y_{0,a} \ln \left( 1 + \frac{B_a P_t^{n1} y}{x} \right) - Y_{0,b} \ln \left( 1 + \frac{B_b P_t^{n2} (1-y)}{(1-x)} \right) = 0 \dots \dots \dots (7)$$

where  $Y_{0,a}$ ,  $B_a$  and  $n1$  are the Langmuir-Freundlich fitting parameters of adsorption equilibrium of pure A,  $Y_{0,b}$ ,  $B_b$  and  $n2$  are Langmuir-Freundlich parameters of adsorption equilibrium of pure B. The unknown  $x$  in Eq. (7) has been solved by Matlab (Version 7.8 (R2009a), The MathWorks, Inc.) for fixed  $P_t$  and  $y$  values.

Then calculated the predicted adsorption selectivity, which is defined as

$$S = \left( \frac{\frac{x_1}{y_1}}{\frac{x_2}{y_2}} \right) \dots\dots\dots(8)$$

where  $x_i$  and  $y_i$  are the mole fractions of component  $i$  ( $i = 1, 2; A, B$ ) in the adsorbed and bulk phases, respectively. The IAST calculations were carried out for a binary mixture containing 50-50 mixture of gases.

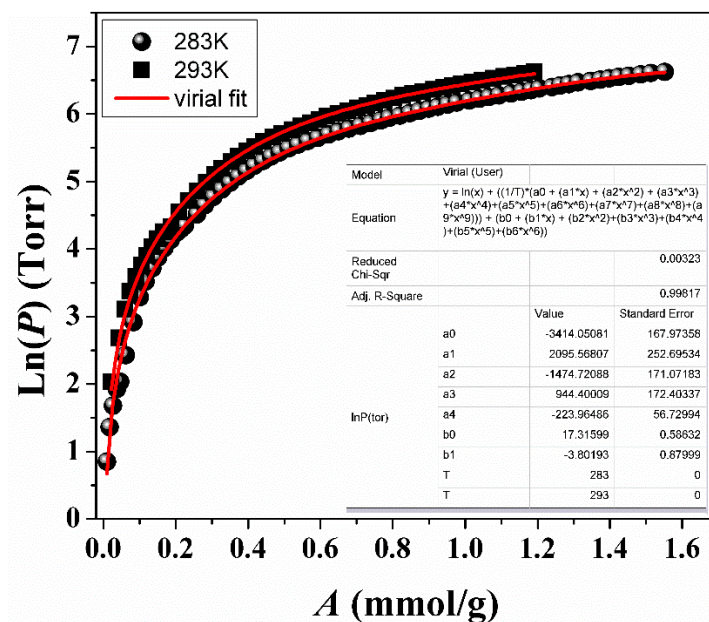

**Figure S16:** C<sub>2</sub>H<sub>2</sub> isotherms for activated **2** (**2a**) measured at 283 K (black circle) and 293 K (black square). Fitted curves (red solid lines), obtained from the virial-type expansion, were used for the  $Q_{st}$  estimation.

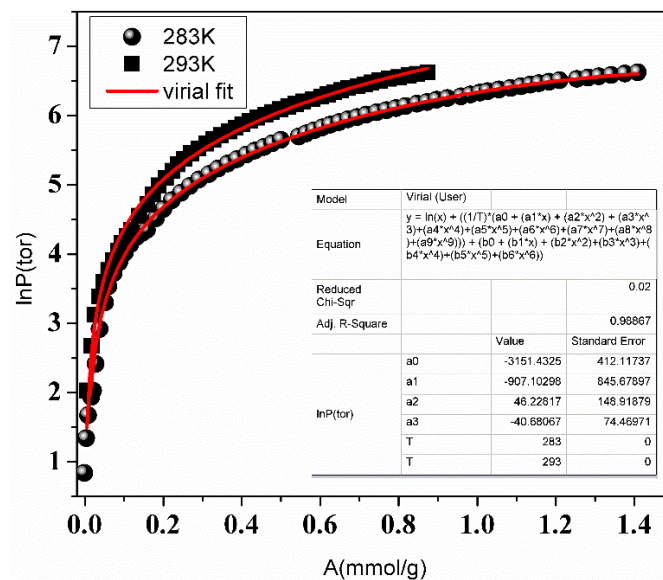

**Figure S17:**  $C_2H_2$  isotherms for activated **2IR** (**2IRa**) measured at 283 K (black circle) and 293 K (black square). Fitted curves (red solid lines), obtained from the virial-type expansion, were used for the  $Q_{st}$  estimation.

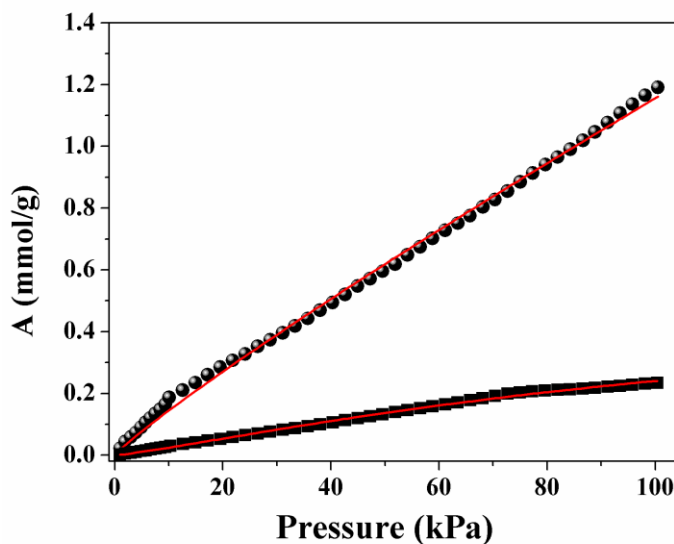

**Figure S18:** Langmuir-Freundlich fittings (red lines) for (a)  $C_2H_2$  (black circle) and (b)  $C_2H_4$  (black square) isotherms measured at 293 K for **2a**.

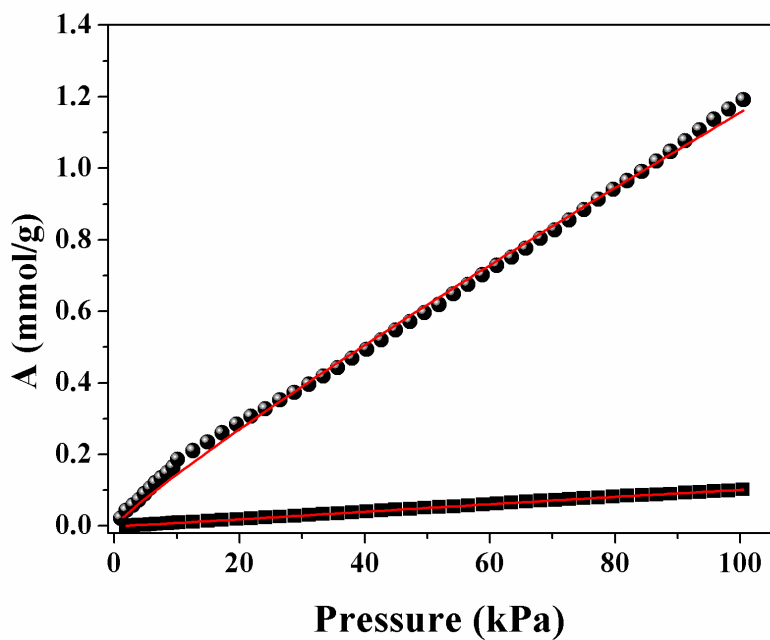

**Figure S19:** Langmuir-Freundlich fittings (red lines) for (a)  $\text{C}_2\text{H}_2$  (black circle) and (b)  $\text{C}_2\text{H}_6$  (black Square) isotherms measured at 293 K for **2a**.

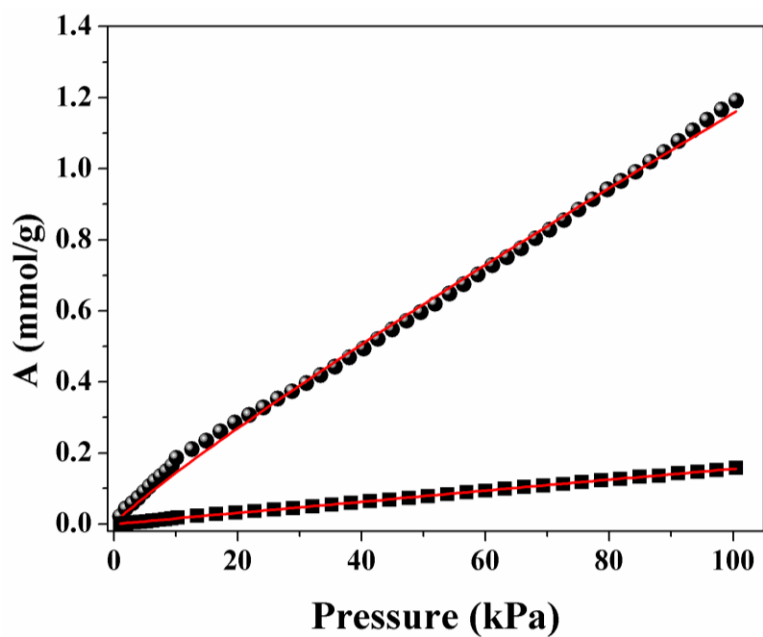

**Figure S20:** Langmuir-Freundlich fittings (red lines) for (a)  $\text{C}_2\text{H}_2$  (black circle) and (b)  $\text{CH}_4$  (black Square) isotherms measured at 293 K for **2a**.

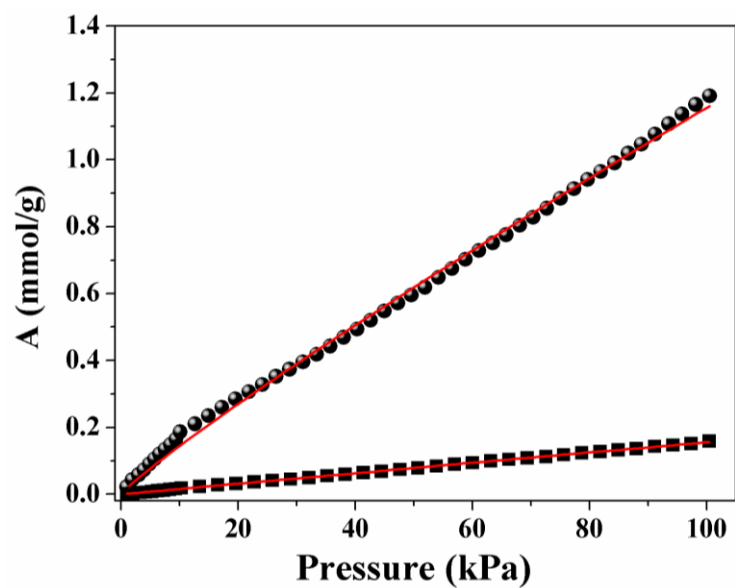

**Figure S21:** Langmuir-Freundlich fittings (red lines) for (a)  $\text{C}_2\text{H}_2$  (black circle) and (b)  $\text{C}_2\text{H}_4$  (black Square) isotherms measured at 293 K for **2IRa**.

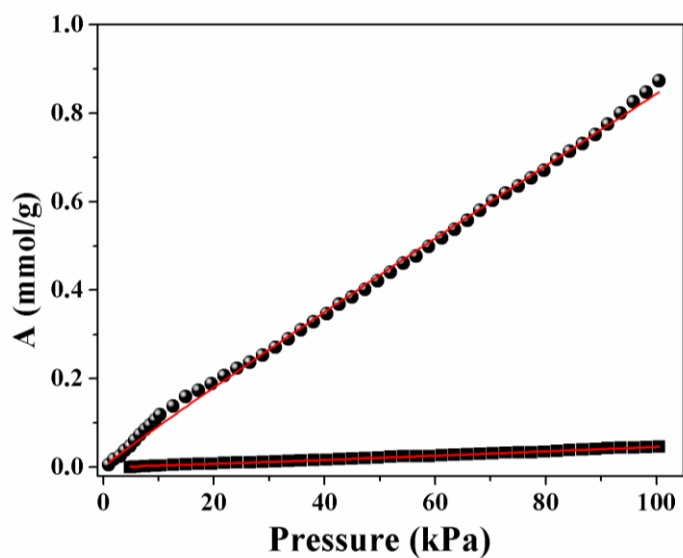

**Figure S22:** Langmuir-Freundlich fittings (red lines) for (a)  $\text{C}_2\text{H}_2$  (black circle) and (b)  $\text{C}_2\text{H}_6$  (black Square) isotherms measured at 293 K for **2IRa**.



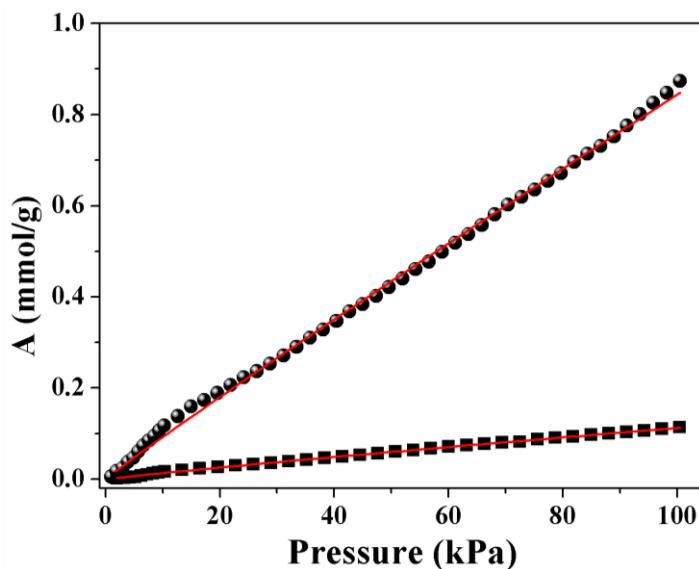

**Figure S23:** Langmuir-Freundlich fittings (red lines) for (a)  $\text{C}_2\text{H}_2$  (black circle) and (b)  $\text{CH}_4$  (black Square) isotherms measured at 293 K for **2IRa**.

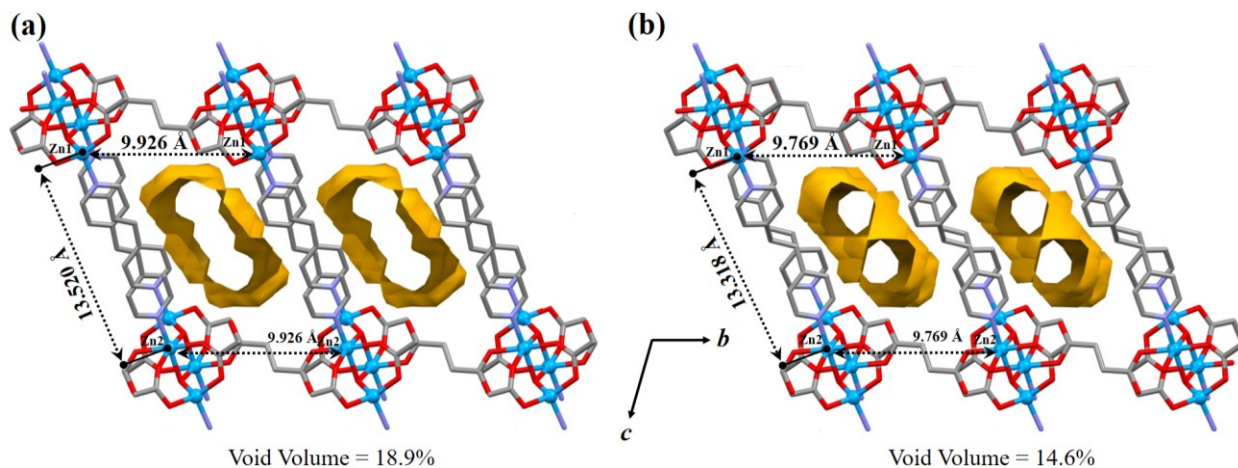

**Figure S24:** Connolly surface of **2** (a) and **2IR** (b) drawn in the Mercury software with a probe radius of 1.2 Å. After the [2+2] cycloaddition reaction, pore shrinkage has been observed in the photoirradiated framework which is also reflected by the decrease in the void volume.

### Column Breakthrough Experiment:

The performance of **2a** in the actual adsorption-based separation and purification process of acetylene from  $\text{C}_2\text{H}_2/\text{C}_2\text{H}_4$  mixtures containing 1% acetylene was examined through

experimental column breakthrough (See Fig. S10 of ref S7)<sup>8</sup> in which a C<sub>2</sub>H<sub>2</sub>/C<sub>2</sub>H<sub>4</sub> (1:99, v/v) mixture was flowed through a packed column of **2a** with a total flow rate of 2.2 mL min<sup>-1</sup> at 293 K. C<sub>2</sub>H<sub>4</sub> molecules were detected at the output of the column after 2.3 min of starting the gas flow through **2a** whereas no trace of C<sub>2</sub>H<sub>2</sub> was found upto 7.2 min. After that, C<sub>2</sub>H<sub>2</sub> molecules slowly started releasing from the outlet which was saturated after 17 min. The efficient purification of C<sub>2</sub>H<sub>4</sub> from the gas mixture has been successfully achieved with a total C<sub>2</sub>H<sub>2</sub> retention time of 7.2 min.

## References

1. Blatov, V. A.; Shevchenko, A. P.; Proserpio, D. M., Applied Topological Analysis of Crystal Structures with the Program Package ToposPro. *Cryst. Growth Des.*, **2014**, *14*, 3576-3586.
2. Dincă, M.; Dailly, A.; Liu, Y.; Brown, C. M.; Neumann, D. A.; Long, J. R., Hydrogen Storage in a Microporous Metal–Organic Framework with Exposed Mn<sup>2+</sup> Coordination Sites. *J. Am. Chem. Soc.*, **2006**, *128*, 16876-16883.
3. Bae, Y.-S.; Mulfort, K. L.; Frost, H.; Ryan, P.; Punnnathanam, S.; Broadbelt, L. J.; Hupp, J. T.; Snurr, R. Q., Separation of CO<sub>2</sub> from CH<sub>4</sub> Using Mixed-Ligand Metal–Organic Frameworks. *Langmuir*, **2008**, *24*, 8592-8598.
4. Myers, A. L.; Prausnitz, J. M., Thermodynamics of mixed-gas adsorption. *AIChE J.*, **1965**, *11*, 121-127.
5. Huang, Y.-L.; Gong, Y.-N.; Jiang, L.; Lu, T.-B., A unique magnesium-based 3D MOF with nanoscale cages and temperature dependent selective gas sorption properties. *Chem. Commun.*, **2013**, *49*, 1753-1755.
6. Liu, B.; Smit, B., Comparative Molecular Simulation Study of CO<sub>2</sub>/N<sub>2</sub> and CH<sub>4</sub>/N<sub>2</sub> Separation in Zeolites and Metal–Organic Frameworks. *Langmuir*, **2009**, *25*, 5918-5926.
7. Babarao, R.; Hu, Z.; Jiang, J.; Chempath, S.; Sandler, S. I., Storage and Separation of CO<sub>2</sub> and CH<sub>4</sub> in Silicalite, C168 Schwarzite, and IRMOF-1: A Comparative Study from Monte Carlo Simulation. *Langmuir*, **2007**, *23*, 659-666.
8. Hazra, A.; Jana, S.; Bonakala, S.; Balasubramanian, S.; Maji, T. K., Separation/purification of ethylene from an acetylene/ethylene mixture in a pillared-layer porous metal–organic framework. *Chem. Commun.*, **2017**, *53*, 4907-4910.
